# Supplementary material
Source: ML conference proceedings conference paper supplement (https://openaccess.thecvf.com/content/CVPR2023/html/Jafarian_Normal-Guided_Garment_UV_CVPR_2023_paper.html)
Supplement: Supplementary file 1 [file Jafarian_Normal-Guided_Garment_UV_CVPR_2023_supplemental.zip]

# Normal-guided Garment UV Prediction for Human Re-texturing

## Supplementary Material

### 1. Derivation of Equation (6)

Given Equation (2),  $\tilde{\mathbf{N}}_{\mathbf{x}} = f_u \times f_v$ , the surface normal can be expressed as:

$$\begin{aligned}\tilde{n}_x &= \frac{\partial y}{\partial u} \frac{\partial z}{\partial v} - \frac{\partial y}{\partial v} \frac{\partial z}{\partial u} \\ \tilde{n}_y &= \frac{\partial z}{\partial u} \frac{\partial x}{\partial v} - \frac{\partial z}{\partial v} \frac{\partial x}{\partial u} \\ \tilde{n}_z &= \frac{\partial x}{\partial u} \frac{\partial y}{\partial v} - \frac{\partial x}{\partial v} \frac{\partial y}{\partial u},\end{aligned}\quad (12)$$

where  $f_u = [\frac{\partial x}{\partial u} \quad \frac{\partial y}{\partial u} \quad \frac{\partial z}{\partial u}]^T$ ,  $f_v = [\frac{\partial x}{\partial v} \quad \frac{\partial y}{\partial v} \quad \frac{\partial z}{\partial v}]^T$ , and  $\tilde{\mathbf{N}}_{\mathbf{x}} = [\tilde{n}_x \quad \tilde{n}_y \quad \tilde{n}_z]^T$ .

Given the expression of the surface normal, it is possible to express  $g_x$  and  $g_y$  in terms of  $f_u$  and  $f_v$  using the inverse function theorem (Equation (5)),  $\mathbf{J}_g = (\mathbf{J}_{f^{1:2}})^{-1}$ :

$$\begin{bmatrix} \frac{\partial u}{\partial x} & \frac{\partial u}{\partial y} \\ \frac{\partial v}{\partial x} & \frac{\partial v}{\partial y} \end{bmatrix} = \begin{bmatrix} \frac{\partial x}{\partial u} & \frac{\partial x}{\partial v} \\ \frac{\partial y}{\partial u} & \frac{\partial y}{\partial v} \end{bmatrix}^{-1} \quad (13)$$

$$= \frac{1}{\frac{\partial x}{\partial u} \frac{\partial y}{\partial v} - \frac{\partial x}{\partial v} \frac{\partial y}{\partial u}} \begin{bmatrix} \frac{\partial y}{\partial v} & -\frac{\partial x}{\partial v} \\ -\frac{\partial y}{\partial u} & \frac{\partial x}{\partial u} \end{bmatrix} \quad (14)$$

$$= \frac{1}{\tilde{n}_z} \begin{bmatrix} \frac{\partial y}{\partial v} & -\frac{\partial x}{\partial v} \\ -\frac{\partial y}{\partial u} & \frac{\partial x}{\partial u} \end{bmatrix} \quad (15)$$

Therefore, the partial derivatives of  $g$  with respect to  $x$  and  $y$  can be written as:

$$g_x = \frac{1}{\tilde{n}_z} \begin{bmatrix} \frac{\partial y}{\partial v} \\ -\frac{\partial y}{\partial u} \end{bmatrix}, \quad g_y = \frac{1}{\tilde{n}_z} \begin{bmatrix} -\frac{\partial x}{\partial v} \\ \frac{\partial x}{\partial u} \end{bmatrix}. \quad (16)$$

To eliminate  $f_u$  and  $f_v$  from Equation (16), we derive a set of partial differential equations that are equivalent up to the choice of the coordinate system of the UV map:

$$\begin{aligned}\|g_x\|^2 &= \frac{1}{\tilde{n}_z^2} \left( \left( \frac{\partial y}{\partial v} \right)^2 + \left( \frac{\partial y}{\partial u} \right)^2 \right) \\ &= \frac{\tilde{n}_x^2 + \tilde{n}_y^2}{\tilde{n}_z^2}\end{aligned}\quad (17)$$

because from Equation (12),  $\tilde{n}_x^2 + \tilde{n}_y^2$  can be expressed as:

$$\begin{aligned}\tilde{n}_x^2 + \tilde{n}_y^2 &= \left( \frac{\partial y}{\partial u} \frac{\partial z}{\partial v} - \frac{\partial y}{\partial v} \frac{\partial z}{\partial u} \right)^2 + \left( \frac{\partial x}{\partial u} \frac{\partial y}{\partial v} - \frac{\partial x}{\partial v} \frac{\partial y}{\partial u} \right)^2 \\ &= \left( \frac{\partial y}{\partial u} \right)^2 \left( \frac{\partial z}{\partial v} \right)^2 + \left( \frac{\partial y}{\partial v} \right)^2 \left( \frac{\partial z}{\partial u} \right)^2 - 2 \frac{\partial y}{\partial u} \frac{\partial y}{\partial v} \frac{\partial z}{\partial u} \frac{\partial z}{\partial v} \\ &\quad + \left( \frac{\partial x}{\partial u} \right)^2 \left( \frac{\partial y}{\partial v} \right)^2 + \left( \frac{\partial x}{\partial v} \right)^2 \left( \frac{\partial y}{\partial u} \right)^2 - 2 \frac{\partial x}{\partial u} \frac{\partial x}{\partial v} \frac{\partial y}{\partial u} \frac{\partial y}{\partial v} \\ &= \left( \frac{\partial y}{\partial u} \right)^2 \left( 1 - \left( \frac{\partial y}{\partial v} \right)^2 \right) + \left( \frac{\partial y}{\partial v} \right)^2 \left( 1 - \left( \frac{\partial y}{\partial u} \right)^2 \right) \\ &\quad - 2 \frac{\partial y}{\partial u} \frac{\partial y}{\partial v} \left( \frac{\partial x}{\partial u} \frac{\partial x}{\partial v} + \frac{\partial z}{\partial u} \frac{\partial z}{\partial v} \right) \\ &= \left( \frac{\partial y}{\partial u} \right)^2 + \left( \frac{\partial y}{\partial v} \right)^2 - 2 \frac{\partial y}{\partial u} \frac{\partial y}{\partial v} \left( \frac{\partial x}{\partial u} \frac{\partial x}{\partial v} + \frac{\partial y}{\partial u} \frac{\partial y}{\partial v} + \frac{\partial z}{\partial u} \frac{\partial z}{\partial v} \right) \\ &= \left( \frac{\partial y}{\partial u} \right)^2 + \left( \frac{\partial y}{\partial v} \right)^2,\end{aligned}\quad (18)$$

given Equation (1), or

$$\|f_u\|^2 = \left( \frac{\partial x}{\partial u} \right)^2 + \left( \frac{\partial y}{\partial u} \right)^2 + \left( \frac{\partial z}{\partial u} \right)^2 = 1 \quad (19)$$

$$\|f_v\|^2 = \left( \frac{\partial x}{\partial v} \right)^2 + \left( \frac{\partial y}{\partial v} \right)^2 + \left( \frac{\partial z}{\partial v} \right)^2 = 1 \quad (20)$$

$$f_u^T f_v = \frac{\partial x}{\partial u} \frac{\partial x}{\partial v} + \frac{\partial y}{\partial u} \frac{\partial y}{\partial v} + \frac{\partial z}{\partial u} \frac{\partial z}{\partial v} = 0. \quad (21)$$

Similarly, we have

$$\begin{aligned}\|g_y\|^2 &= \frac{1}{\tilde{n}_z^2} \left( \left( \frac{\partial x}{\partial u} \right)^2 + \left( \frac{\partial x}{\partial v} \right)^2 \right) \\ &= \frac{\tilde{n}_y^2 + \tilde{n}_z^2}{\tilde{n}_z^2}.\end{aligned}\quad (22)$$

Further, the angle between the vector can be represented as:

$$\begin{aligned}g_x^T g_y &= -\frac{1}{\tilde{n}_z^2} \left( \frac{\partial x}{\partial v} \frac{\partial y}{\partial v} + \frac{\partial x}{\partial u} \frac{\partial y}{\partial u} \right) \\ &= \frac{\tilde{n}_x \tilde{n}_y}{\tilde{n}_z^2}\end{aligned}\quad (23)$$

because  $\tilde{n}_x \tilde{n}_y$  can be written as:

$$\begin{aligned}
\tilde{n}_x \tilde{n}_y &= \left( \frac{\partial y}{\partial u} \frac{\partial z}{\partial v} - \frac{\partial y}{\partial v} \frac{\partial z}{\partial u} \right) \left( \frac{\partial z}{\partial u} \frac{\partial x}{\partial v} - \frac{\partial z}{\partial v} \frac{\partial x}{\partial u} \right) \\
&= -\frac{\partial y}{\partial u} \frac{\partial x}{\partial u} \left( \frac{\partial z}{\partial v} \right)^2 - \frac{\partial y}{\partial v} \frac{\partial x}{\partial v} \left( \frac{\partial z}{\partial u} \right)^2 \\
&\quad + \left( \frac{\partial z}{\partial u} \frac{\partial z}{\partial v} \right) \left( \frac{\partial y}{\partial u} \frac{\partial x}{\partial v} + \frac{\partial y}{\partial v} \frac{\partial x}{\partial u} \right) \\
&= -\frac{\partial y}{\partial u} \frac{\partial x}{\partial u} + \frac{\partial y}{\partial u} \frac{\partial x}{\partial u} \left( \frac{\partial x}{\partial v} \right)^2 + \frac{\partial y}{\partial u} \frac{\partial x}{\partial u} \left( \frac{\partial y}{\partial v} \right)^2 \\
&\quad - \frac{\partial y}{\partial v} \frac{\partial x}{\partial v} + \frac{\partial y}{\partial v} \frac{\partial x}{\partial v} \left( \frac{\partial x}{\partial u} \right)^2 + \frac{\partial y}{\partial v} \frac{\partial x}{\partial v} \left( \frac{\partial y}{\partial u} \right)^2 \\
&\quad - \left( \frac{\partial x}{\partial u} \frac{\partial x}{\partial v} + \frac{\partial y}{\partial u} \frac{\partial y}{\partial v} \right) \left( \frac{\partial y}{\partial u} \frac{\partial x}{\partial v} + \frac{\partial y}{\partial v} \frac{\partial x}{\partial u} \right) \\
&= - \left( \frac{\partial y}{\partial u} \frac{\partial x}{\partial u} + \frac{\partial y}{\partial v} \frac{\partial x}{\partial v} \right). \tag{24}
\end{aligned}$$

Equation (17), (22), (23) form a set of partial differential equations of  $g$  with respect to the surface normal where we solve these equations by minimizing the loss of  $\mathcal{L}_{\text{geo}}$ .
